# Supplementary material for: Obesity control by SHIP inhibition requires pan-paralog inhibition and an intact eosinophil compartment
Source: Research Square preprint supplement (doi:10.21203/rs.3.rs-89532/v1), 2020-10-15
Supplement: Supplementary file [file ff63eec2eebb21809724ff07.pdf]

## Supplemental Figure Legend

**Supplemental Fig. 1. Gating strategy for flow cytometry analysis of SVC from eWAT from C57Bl/6 mice treated with SHIPi.** Doublets and dead cells (stained with Zombie Aqua) were excluded from all analysis. **(A, C.)** Eosinophils were defined as CD45<sup>+</sup>SSC<sup>hi</sup>, CD11b<sup>lo</sup>, Siglec-F<sup>+</sup>, with additional subgate on IL4<sup>+</sup> cells (from intracellular staining). Fluorescence minus one (FMO) for IL4 is also shown and was used as a reference point for IL4<sup>+</sup> gate placement. **(B, D)** MDSC (left panels) were defined as Live CD11b<sup>+</sup>Gr1<sup>+</sup>. Live cells were then gated for CD19<sup>-</sup>CD11b<sup>+</sup>, then F4/80<sup>+</sup>Gr1<sup>-</sup>. M1 were defined in the subgate as CD11c<sup>+</sup>CD86<sup>lo</sup> and M2 as CD11c<sup>-</sup>CD86<sup>+</sup> (right panels). M1/M2 was calculated as the frequency of M1 over M2 from parent gate. In the prevention model shown for K149 **(A, B)**, mice were placed on HFD on the first day of SHIPi treatment and maintained on HFD for 6 weeks. In the treatment model shown for K161 **(C, D)** mice were placed on HFD 8 weeks prior to the start of SHIPi treatment and maintained on HFD for the 4 week duration of the study.

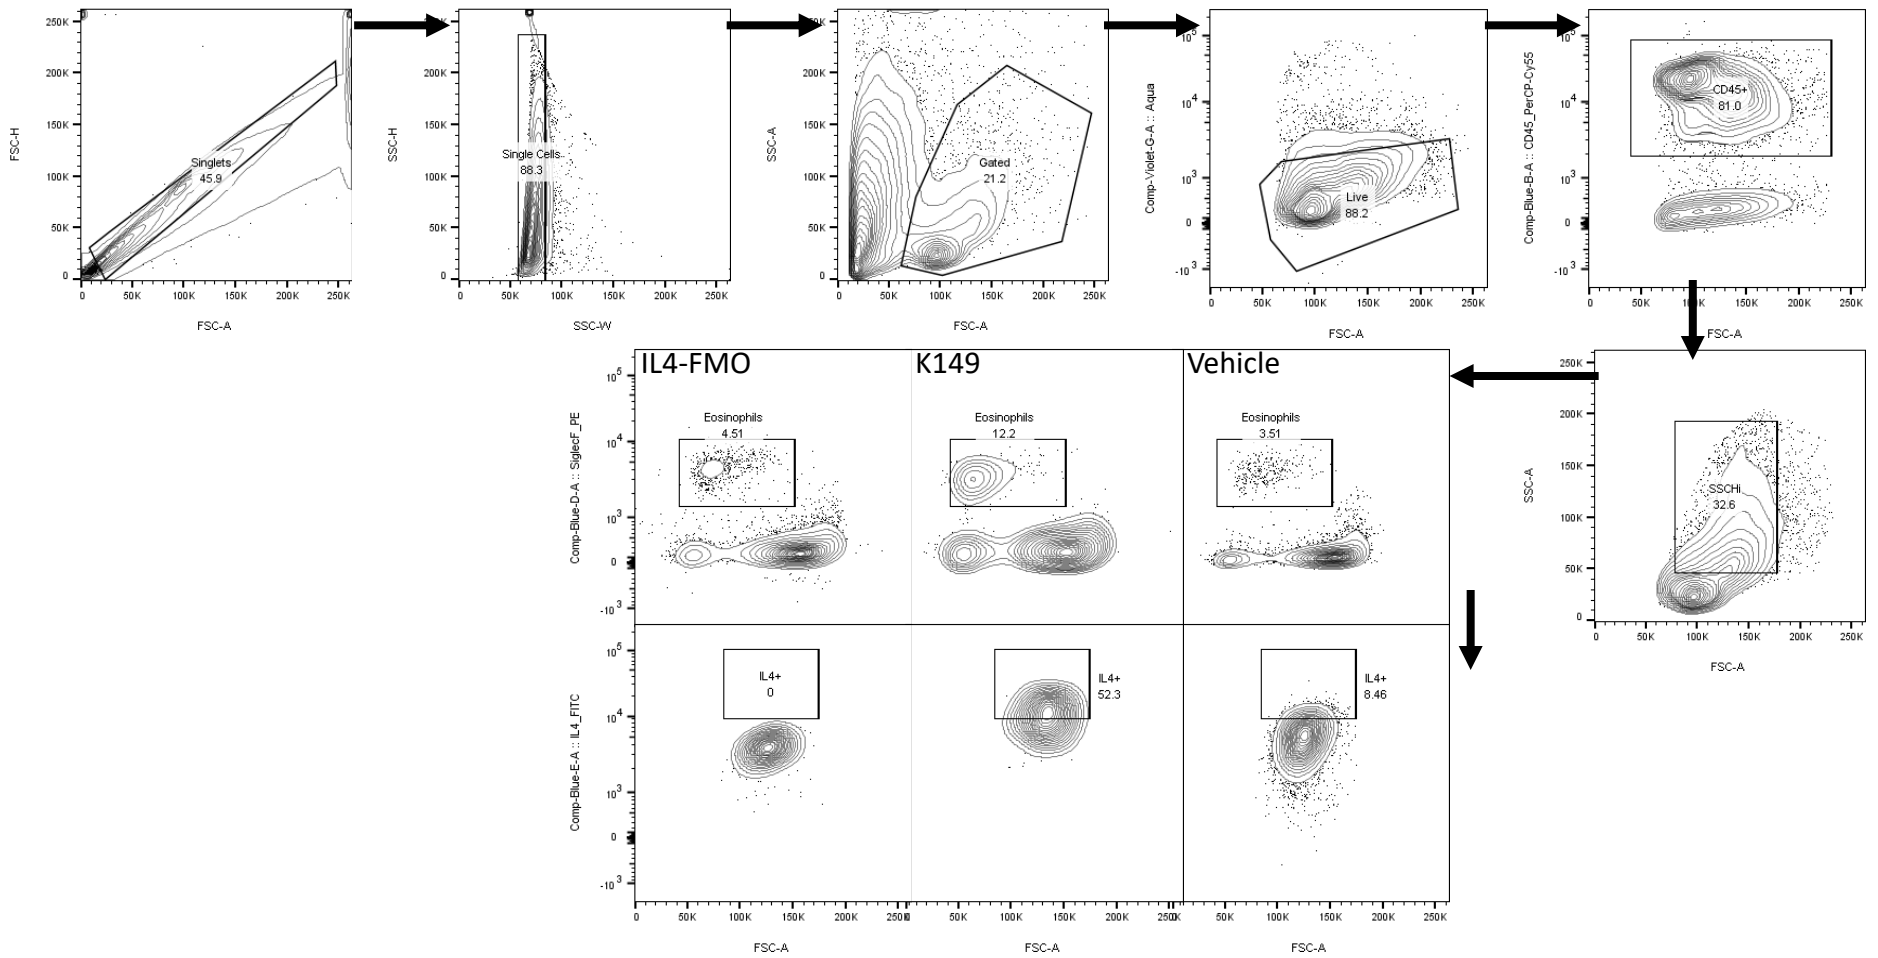

Supplemental Fig.1A Gating strategy Eosinophils K149 Prevention Model

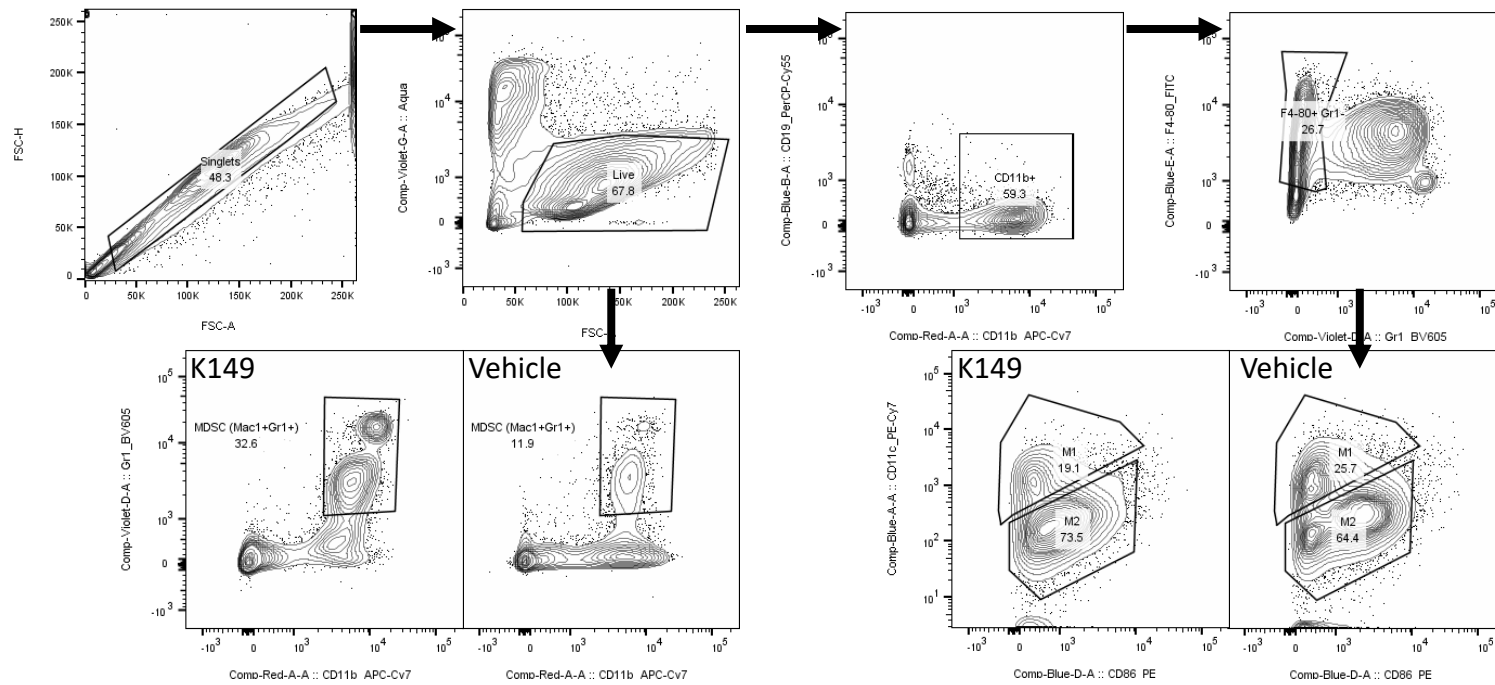

Supplemental Fig.1B. Gating strategy MDSC and M1/M2 K149 Prevention Model

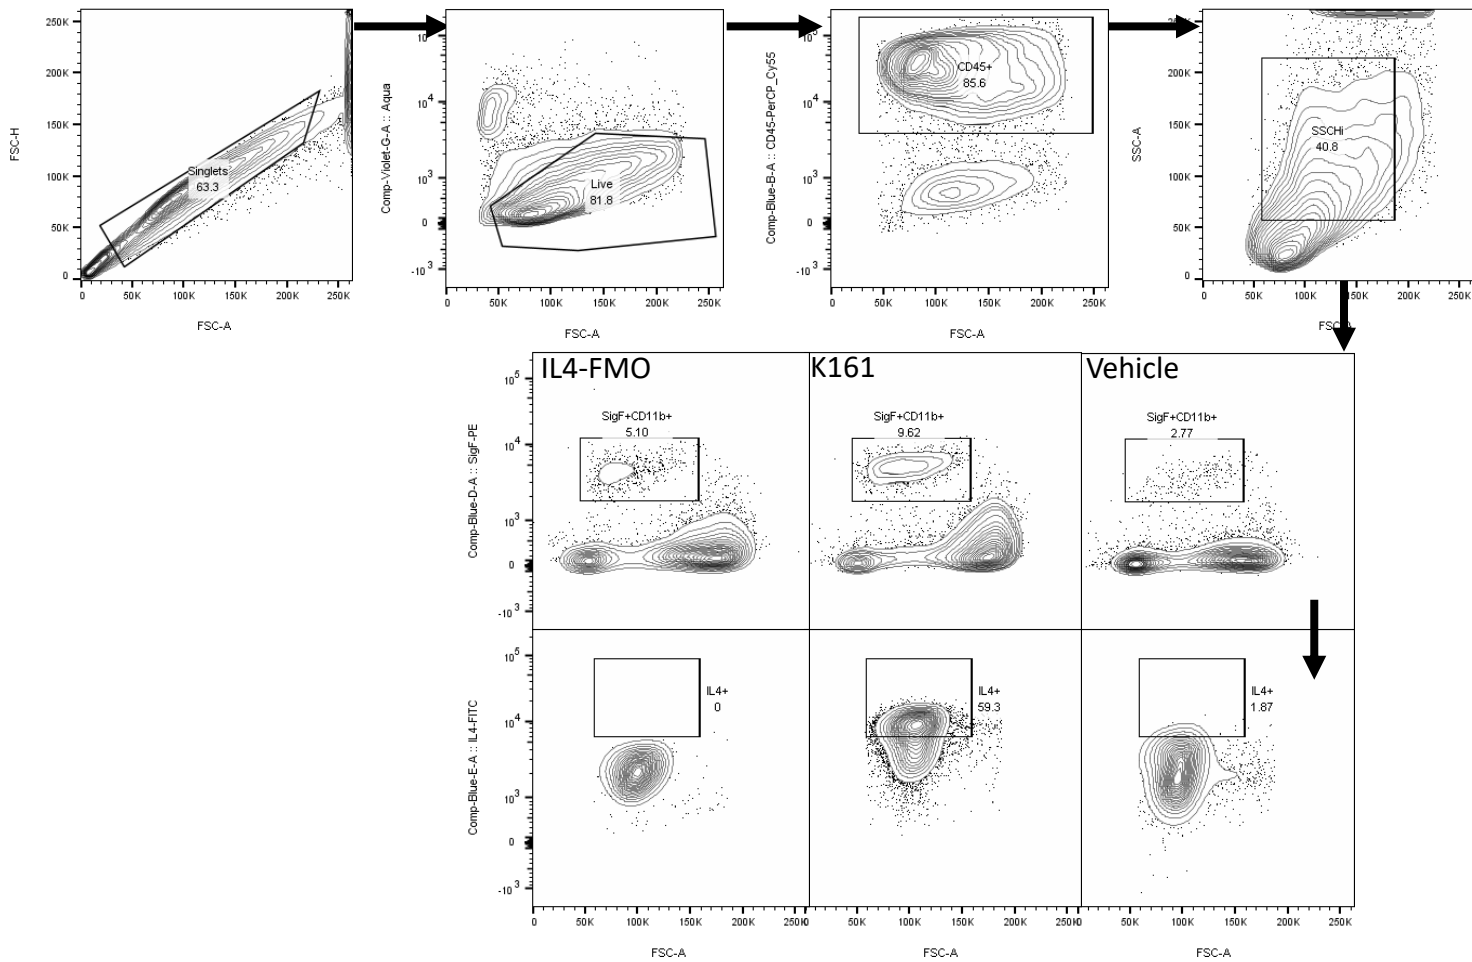

Supplemental Fig.1C Gating strategy Eosinophils K161 Treatment Model

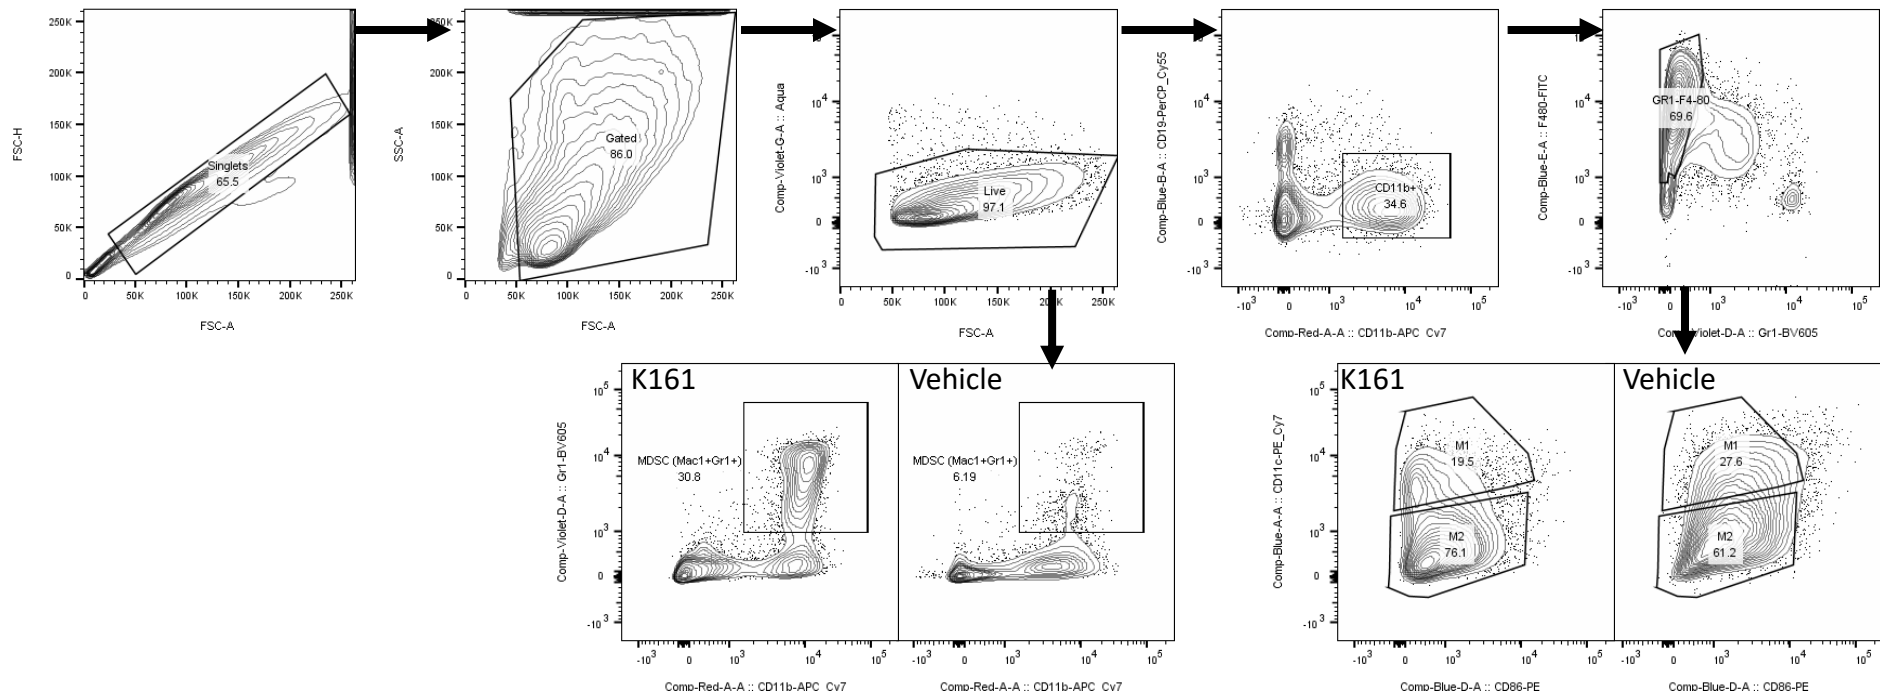

Supplemental Fig.1D. Gating strategy MDSC and M1/M2 K161 Treatment Model
